# Supplementary material
Source: PubMed Central journal article supplement (PMC3305786)
Supplement: NIHMS285034-supplement-1_si_001.pdf [file NIHMS285034-supplement-1_si_001.pdf]

## Derivation of Equation for Diameter Estimation

### *Parabolic Flow Profile Approximation*

For this approach, the equations for fiber diameter prediction are adapted from volume conservation, assuming known inlet and outlet velocities. A parabolic flow profile in the tube is approximated by

$$v_z(r) = \frac{\partial p}{4\eta} (R^2 - r^2) = \frac{K}{4\eta} (R^2 - r^2) = v_0 \left(1 - \frac{r^2}{R^2}\right), \quad (2)$$

where  $v$  is velocity,  $p$  is pressure,  $z$  is the direction of flow,  $\eta$  is viscosity,  $R$  is radius,  $K = \frac{\partial p}{\partial z}$  and  $v_0$  is the maximum velocity at the center of the tube, as defined by

$$v_0 = \frac{KR^2}{4\eta}. \quad (3)$$

Volume flow ( $V$ ) in a cylindrical tube is given by

$$V = \int_0^R v_z(r) 2\pi r dr. \quad (4)$$

For this system

$$\frac{V_{silk}}{V_{outlet}} = \frac{\int_0^{r_{fiber}} v_z(r) 2\pi r dr}{\int_0^R v_z(r) 2\pi r dr} = \frac{2r_{fiber}^2}{R^2} - \frac{r_{fiber}^4}{R^4} \quad (5)$$

and

$$R = \sqrt{\frac{Q_{outlet}}{\pi}} \quad (6)$$

where  $Q$  is cross-sectional area, giving

$$\frac{V_{silk}}{V_{outlet}} = \frac{2\pi r_{fiber}^2}{Q_{outlet}} - \frac{\pi^2 r_{fiber}^4}{Q_{outlet}^2}. \quad (7)$$

Since  $r_{fiber}^2 \ll Q_{outlet}$  this can be simplified to

$$\frac{V_{silk}}{V_{outlet}} = \frac{2\pi r_{fiber}^2}{Q_{outlet}} \quad (8)$$

and therefore

$$d = \sqrt{\frac{2}{\pi} \frac{V_{silk}}{V_{outlet}} Q_{outlet}}. \quad (9)$$
